# Supplementary material for: Hypoglycaemia Awareness Restoration Programme for People with Type 1 Diabetes and Problematic Hypoglycaemia Persisting Despite Optimised Self-care (HARPdoc): protocol for a group randomised controlled trial of a novel intervention addressing cognitions
Source: PubMed Central journal article supplement — BMJ Open. 2019 Jun 16;9(6):e030356. doi: 10.1136/bmjopen-2019-030356 (PMC6588968; doi:10.1136/bmjopen-2019-030356), 2019-06-16
Supplement: bmjopen-2019-030356.reviewer_comments.pdf [file bmjopen-2019-030356.reviewer_comments.pdf]

## PEER REVIEW HISTORY

BMJ Open publishes all reviews undertaken for accepted manuscripts. Reviewers are asked to complete a checklist review form (<http://bmjopen.bmj.com/site/about/resources/checklist.pdf>) and are provided with free text boxes to elaborate on their assessment. These free text comments are reproduced below.

## ARTICLE DETAILS

|                            |                                                                                                                                                                                                                                                                                                                             |
|----------------------------|-----------------------------------------------------------------------------------------------------------------------------------------------------------------------------------------------------------------------------------------------------------------------------------------------------------------------------|
| <b>TITLE (PROVISIONAL)</b> | The Hypoglycaemia Awareness Restoration Programme for people with type 1 diabetes and problematic hypoglycaemia persisting despite optimised self-care (HARPdoc): protocol for a group randomized controlled trial of a novel intervention addressing cognitions.                                                           |
| <b>AUTHORS</b>             | Amiel, Stephanie; Choudhary, P; Jacob, Peter; Smith, Emma; De Zoysa, Nicole; Gonder-Frederick, Linda; Kendall, Mike; Heller, Simon; Brooks, Augustin; Toschi, Elena; Kariyawasam, Dulmini; Potts, Laura; Healy, Andy; Rogers, Helen; Sevdalis, Nick; Stadler, Marietta; Qayyum, Mustabshira; Bakolis, Ioannis; Goldsmith, K |

This article was not externally reviewed at BMJ Open. Protocols that have been independently assessed prior to submission to BMJ Open are usually fast-tracked to publication on the grounds that further substantial changes will not be possible. This independent assessment will usually be external, independent review for both a substantial grant award from a non-commercial or government funder and ethics approval.
